# Supplementary material for: Plasma, urine, and stool metabolites in response to dietary rice bran and navy bean supplementation in adults at high-risk for colorectal cancer
Source: Frontiers journal article supplement (doi:10.3389/fgstr.2023.1087056), 2023-02-15
Supplement: Table_4.XLSX [file Table_4.XLSX]

## Sheet: Lipid fold change
Sub Pathway	Biochemical Name	Control Plasma				Intervention Plasma				control Urine				Intervention Urine				Control Stool		Intervention Stool
		6 vs 0	p-value	12 vs 0	p-value	6 vs 0	p-value	12 vs 0	p-value	6 vs 0	p-value	12 vs 0	p-value	6 vs 0	p-value	12 vs 0	p-value	12 vs 0	p-value	12 vs 0	p-value
Fatty Acid Synthesis	malonate	0.74	0.0021	0.78	0.0086	0.94	0.4181	0.91	0.2451	1.21	0.428388	0.96	0.688519	0.98	0.808162	1.25	0.213752	0.42	0.270701	0.58	0.101064
Medium Chain Fatty Acid	caproate (6:0)	0.87	0.1806	0.8	0.048	0.89	0.6109	0.78	0.0405	-	-	-	-	-	-	-	-	0.55	0.0962663	1.22	0.146139
	caprylate (8:0)	0.79	0.0344	0.8	0.0294	1	0.8581	0.82	0.0141	-	-	-	-	-	-	-	-	1.16	0.995729	1.78	0.981197
	caprate (10:0)	0.76	0.015	0.83	0.1492	0.97	0.9022	0.78	0.0401	-	-	-	-	-	-	-	-	0.56	0.95229	0.78	0.569031
	cis-4-decenoate (10:1n6)*	0.79	0.0274	0.76	0.084	0.92	0.9539	0.69	0.0884	-	-	-	-	-	-	-	-	-	-	-	-
	laurate (12:0)	0.83	0.0994	0.82	0.4118	1	0.9197	0.65	0.0216	-	-	-	-	-	-	-	-	0.41	0.692377	0.56	0.812112
	5-dodecenoate (12:1n7)	0.77	0.0245	0.8	0.141	0.85	0.6057	0.62	0.0049	-	-	-	-	-	-	-	-	0.63	0.752793	1.03	0.386577
Long Chain Saturated Fatty Acid	myristate (14:0)	0.87	0.1158	0.87	0.4863	0.88	0.2791	0.66	0.02	-	-	-	-	-	-	-	-	0.58	0.975724	1.57	0.750015
	pentadecanoate (15:0)	0.89	0.1072	0.98	0.7366	0.92	0.3202	0.78	0.0288	-	-	-	-	-	-	-	-	0.87	0.84136	1.21	0.811967
	palmitate (16:0)	0.87	0.1314	0.94	0.5647	0.87	0.2158	0.74	0.0295	-	-	-	-	-	-	-	-	0.8	0.940765	1.57	0.155064
	stearate (18:0)	0.85	0.044	0.98	0.6936	0.92	0.3012	0.84	0.0683	-	-	-	-	-	-	-	-	0.84	0.760951	1.34	0.20723
	arachidate (20:0)	0.81	0.0569	0.87	0.231	0.83	0.0644	0.8	0.0226	-	-	-	-	-	-	-	-	0.95	0.717273	1.57	0.167186
	behenate (22:0)*	0.71	0.0001	0.72	0.0004	0.89	0.0977	0.75	0.0001	-	-	-	-	-	-	-	-	0.51	0.85159	2.65	0.280509
Long Chain Monounsaturated Fatty Acid	myristoleate (14:1n5)	0.82	0.0599	0.86	0.3359	0.8	0.377	0.65	0.0249	-	-	-	-	-	-	-	-	0.49	0.0770925	0.9	0.892468
	palmitoleate (16:1n7)	0.91	0.1656	0.84	0.5346	0.74	0.161	0.68	0.0374	-	-	-	-	-	-	-	-	0.95	0.760635	1.26	0.637349
	10-heptadecenoate (17:1n7)	0.93	0.1786	0.93	0.6466	0.78	0.1652	0.68	0.04	-	-	-	-	-	-	-	-	0.85	0.820847	0.96	0.998012
	oleate/vaccenate (18:1)	0.84	0.0929	0.93	0.51	0.8	0.1788	0.69	0.027	-	-	-	-	-	-	-	-	1.29	0.465605	1.42	0.168888
	10-nonadecenoate (19:1n9)	0.88	0.112	0.99	0.6471	0.83	0.2077	0.72	0.0352	-	-	-	-	-	-	-	-	0.97	0.813933	1.43	0.247157
Long Chain Polyunsaturated Fatty Acid (n3 and n6)	tetradecadienoate (14:2)*	0.74	0.0358	0.77	0.1341	0.76	0.9706	0.59	0.0692	-	-	-	-	-	-	-	-	1.24	0.923581	0.68	0.945704
	hexadecadienoate (16:2n6)	0.9	0.2188	0.79	0.2102	0.67	0.3245	0.59	0.0411	-	-	-	-	-	-	-	-	1.09	0.877527	1.79	0.0961223
	linoleate (18:2n6)	0.84	0.0588	0.86	0.3004	0.81	0.3159	0.62	0.018	-	-	-	-	-	-	-	-	1.5	0.299756	2.05	0.088527
	linolenate [alpha or gamma; (18:3n3 or 6)]	0.85	0.1358	0.81	0.357	0.86	0.4317	0.56	0.013	-	-	-	-	-	-	-	-	4.93	0.0850478	10.14	0.0452612
	dihomo-linolenate (20:3n3 or n6)	0.88	0.1528	0.88	0.3445	0.86	0.269	0.73	0.0374	-	-	-	-	-	-	-	-	1.01	0.704626	0.83	0.95853
	arachidonate (20:4n6)	0.86	0.11	0.88	0.293	0.91	0.5597	0.71	0.0353	-	-	-	-	-	-	-	-	0.39	0.441326	0.65	0.956818
	adrenate (22:4n6)	0.78	0.0741	0.9	0.3717	0.6	0.0693	0.47	0.0111	-	-	-	-	-	-	-	-	0.32	0.112288	0.44	0.684728
Fatty Acid, Dicarboxylate	2-hydroxyglutarate	0.83	0.1444	0.74	0.0161	0.87	0.1894	0.73	0.0069	0.89	0.541366	0.94	0.440106	1.1	0.856116	1.13	0.744403	0.56	0.475949	1	0.515158
	2-hydroxyadipate	-	-	-	-	-	-	-	-	0.73	0.0300371	0.84	0.222235	0.96	0.831057	0.88	0.312706	0.67	0.117759	0.73	0.94703
	3-hydroxyadipate*	0.68	0.0033	0.59	0.0006	1	0.9899	0.85	0.2789	0.94	0.271663	0.97	0.425191	1.18	0.27646	1.02	0.899562	0.92	0.751556	1.07	0.430315
	sebacate (C10-DC)	0.93	0.6364	1.05	0.8035	0.91	0.6926	0.95	0.7588	1.99	0.165319	1.51	0.31459	1.47	0.430481	1.56	0.0853887	0.85	0.53025	1.61	0.0391791
	undecanedioate (C11-DC)	0.97	0.8629	1.5	0.0551	0.87	0.6388	0.83	0.3451	-	-	-	-	-	-	-	-	0.78	0.31541	1.43	0.0438713
	dodecadienoate (12:2)*	0.83	0.0364	0.77	0.0638	1.06	0.3726	0.75	0.1242	-	-	-	-	-	-	-	-	-	-	-	-
	dodecanedioate (C12-DC)	0.95	0.9218	0.87	0.9041	1.35	0.0608	0.99	0.964	0.71	0.172183	0.87	0.410779	1.05	0.911105	1.03	0.952295	0.98	0.906686	1.83	0.0479626
	tridecenedioate (C13:1-DC)*	0.85	0.374	1.14	0.7583	1.02	0.9225	0.91	0.3167	5.8	0.00418145	2.42	0.321265	1.55	0.811394	1.38	0.68	0.050422	1.05	0.903495	0.900165
	hexadecanedioate (C16-DC)	0.93	0.4754	0.93	0.4376	1.35	0.0261	1.33	0.082	-	-	-	-	-	-	-	-	1.49	0.119561	1.83	0.00801972
	hexadecenedioate (C16:1-DC)*	0.88	0.3537	0.79	0.0482	1.01	0.7906	1.2	0.3318	-	-	-	-	-	-	-	-	1.28	0.929656	1.36	0.409735
	octadecenedioate (C18:1-DC)*	0.87	0.5453	0.9	0.6319	1.95	0.0036	2.83	0.0018	-	-	-	-	-	-	-	-	1.48	0.699876	1.95	0.361985
	octadecadienedioate (C18:2-DC)*	0.93	0.7045	1.02	0.875	0.24	0.0459	0.52	0.2267	-	-	-	-	-	-	-	-	0.87	0.348631	2.7	0.260053
	eicosanedioate (C20-DC)	0.93	0.4649	0.73	0.0152	0.76	0.0711	0.74	0.0236	-	-	-	-	-	-	-	-	0.87	0.348631	2.7	0.260053
	eicosenedioate (C20:1-DC)*	0.97	0.7043	0.8	0.0476	1.05	0.8828	0.81	0.0078	-	-	-	-	-	-	-	-	-	-	-	-
	docosadioate (C22-DC)	0.79	0.0626	0.77	0.0895	0.84	0.4714	0.66	0.0102	-	-	-	-	-	-	-	-	-	-	-	-
	3-carboxy-4-methyl-5-pentyl-2-furanpropionate (3-CMPFP)**	0.9	0.1512	0.8	0.0387	0.98	0.9749	0.85	0.0924	1.55	0.34891	0.92	0.52322	1.03	0.999037	1.46	0.25552	0.34	0.0672848	0.68	0.51455
	hydroxy-CMPF*	1.04	0.9888	1.12	0.4205	0.98	0.8081	0.96	0.8069	-	-	-	-	-	-	-	-	0.52	0.0280504	1	0.851084
	2-hydroxysebacate	1.12	0.241	1.16	0.3532	1.14	0.8975	1.22	0.396	0.79	0.644337	0.95	0.961769	1.44	0.201825	1.03	0.910305	0.93	0.32621	2.47	0.00711154
Fatty Acid, Amino	2-aminoheptanoate	0.73	0.0127	0.94	0.6624	1.12	0.5998	1.22	0.1199	1.45	0.291374	1.48	0.208881	0.9	0.540153	1.3	0.553237	0.77	0.738395	1.17	0.964534
	2-aminooctanoate	0.74	0.0161	0.89	0.3628	0.91	0.4455	0.88	0.1711	0.89	0.197965	1.14	0.720321	1.03	0.991126	1.18	0.457755	-	-	-	-
	N-acetyl-2-aminooctanoate*	0.72	0.0242	0.79	0.1338	0.86	0.4271	0.89	0.2726	0.79	0.143373	1.05	0.825324	1.1	0.565885	1.13	0.649508	-	-	-	-
Fatty Acid Metabolism (also BCAA Metabolism)	propionylcarnitine (C3)	1.18	0.0201	1.03	0.3937	0.92	0.3868	0.94	0.6582	1.43	0.982463	1.59	0.497199	0.89	0.922601	1.55	0.801179	-	-	-	-
	propionylglycine	1.35	0.7422	1.56	0.0922	1.29	0.0153	1.2	0.0236	0.93	0.971478	0.77	0.749168	1.16	0.32395	1.02	0.969645	0.56	0.106133	0.63	0.143149
	methylmalonate (MMA)	1.85	0.0518	0.9	0.5065	1.01	0.9005	0.98	0.7399	1.19	0.113955	0.99	0.892012	1.1	0.095547	1.21	0.0309816	0.81	0.126966	0.8	0.864996
Fatty Acid Metabolism (Acyl Glycine)	isocaproylglycine	-	-	-	-	-	-	-	-	1	0.406301	1.25	0.11433	1.12	0.0588698	1.2	0.00216027	-	-	-	-
Fatty Acid Metabolism (Acyl Glycine)	4-methylhexanoylglycine	-	-	-	-	-	-	-	-	1.29	0.548369	1.26	0.465503	1.92	0.031771	1.58	0.0280681	-	-	-	-
	picolinoylglycine	1.15	0.1183	1.08	0.3488	0.97	0.9425	0.94	0.4146	1.17	0.196991	1.08	0.500766	1.47	0.0258632	1.54	0.0310855	-	-	-	-
Fatty Acid Metabolism (Acyl Carnitine, Medium Chain)	octanoylcarnitine (C8)	0.83	0.0416	0.8	0.0758	1.15	0.0878	0.85	0.3401	1.27	0.179824	1.32	0.316938	1.16	0.426905	1.29	0.267208	-	-	-	-
	laurylcarnitine (C12)	0.8	0.0457	0.86	0.1383	1.13	0.1787	0.85	0.1662	1.24	0.681971	0.92	0.963452	1.31	0.442568	1.03	0.96939	0.59	0.497172	0.22	0.189969
Fatty Acid Metabolism (Acyl Carnitine, Long Chain Saturated)	arachidoylcarnitine (C20)*	0.84	0.0362	0.88	0.1424	0.93	0.5894	0.88	0.1064	-	-	-	-	-	-	-	-	0.4	0.0860745	1.09	0.54356
	behenoylcarnitine (C22)*	0.71	0.1964	0.69	0.2031	0.9	0.5296	0.69	0.0129	-	-	-	-	-	-	-	-	0.52	0.158467	1.45	0.427569
	stearoylcarnitine (C18)	0.92	0.2415	0.98	0.6579	1.01	0.9546	0.95	0.2637	-	-	-	-	-	-	-	-	0.25	0.00236315	0.69	0.177715
	lignoceroylcarnitine (C24)*	0.8	0.0476	0.79	0.0412	0.92	0.4924	0.84	0.0521	-	-	-	-	-	-	-	-	0.46	0.00619596	0.8	0.281792
	cerotoylcarnitine (C26)*	1	0.9472	0.97	0.8637	0.92	0.2924	0.85	0.0211	-	-	-	-	-	-	-	-	0.62	0.0450074	0.9	0.583123
Fatty Acid Metabolism (Acyl Carnitine, Monounsaturated)	3-decenoylcarnitine	0.93	0.2206	0.85	0.1531	1.2	0.0238	0.9	0.8091	-	-	-	-	-	-	-	-	-	-	-	-
	cis-4-decenoylcarnitine (C10:1)	0.85	0.0454	0.74	0.0175	1.2	0.067	0.88	0.4939	-	-	-	-	-	-	-	-	-	-	-	-
	undecenoylcarnitine (C11:1)	1.06	0.6689	0.97	0.4963	0.96	0.7802	0.94	0.348	1.81	0.0446331	1.68	0.283933	0.85	0.912744	0.96	0.440984	-	-	-	-
	5-dodecenoylcarnitine (C12:1)	0.88	0.6831	0.79	0.2249	1.14	0.3627	1	0.3885	1.47	0.0104318	1.36	0.0811016	0.87	0.941173	0.86	0.847566	-	-	-	-
	myristoleoylcarnitine (C14:1)*	0.83	0.1913	0.88	0.2984	1.13	0.3144	0.88	0.3297	2.67	0.00149237	1.26	0.375425	0.99	0.839923	1.04	0.847806	0.57	0.52185	0.59	0.252792
	eicosenoylcarnitine (C20:1)*	0.94	0.3692	0.99	0.8351	0.93	0.3273	0.89	0.2086	-	-	-	-	-	-	-	-	0.41	0.0119214	1.39	0.53377
Fatty Acid Metabolism (Acyl Carnitine, Polyunsaturated)	linoleoylcarnitine (C18:2)*	0.88	0.0446	0.92	0.3312	1.04	0.6056	0.89	0.2531	-	-	-	-	-	-	-	-	0.7	0.706647	0.56	0.532302
Fatty Acid Metabolism (Acyl Carnitine, Polyunsaturated)	adipoylcarnitine (C6-DC)	0.8	0.0378	0.78	0.0611	1.27	0.0201	1.2	0.1406	0.97	0.29829	1.02	0.864742	1.32	0.232473	1.24	0.743415	-	-	-	-
Fatty Acid Metabolism (Acyl Carnitine, Dicarboxylate)	octadecanedioylcarnitine (C18-DC)*	0.79	0.0491	0.86	0.1859	1.28	0.0531	1.29	0.0679	-	-	-	-	-	-	-	-	-	-	-	-
	octadecenedioylcarnitine (C18:1-DC)*	0.86	0.2889	1.02	0.8363	2.37	5.9522e-06	2.98	1.8127e-06	-	-	-	-	-	-	-	-	1	1	2.44	0.436299
Fatty Acid Metabolism (Acyl Carnitine, Hydroxy)	(R)-3-hydroxybutyrylcarnitine	0.75	0.4002	1.05	0.9447	0.81	0.5194	0.75	0.2054	0.68	0.729234	1.58	0.790976	0.57	0.448577	1.77	0.487576	0.52	0.278055	0.36	0.0418863
	3-hydroxyhexanoylcarnitine (1)	0.9	0.5045	0.94	0.5781	0.95	0.7312	0.78	0.0107	0.82	0.0839959	0.77	0.121875	1.42	0.0349279	1.27	0.229601	1.89	0.820893	2.84	0.259604
Carnitine Metabolism	carnitine	1.02	0.3945	1.04	0.09	1.04	0.0794	1.07	0.0056	1.42	0.487768	1.34	0.63863	1	0.814399	2.03	0.138706	0.71	0.12448	0.58	0.424823
Ketone Bodies	2-hydroxyoctanoate	0.73	0.0344	0.83	0.1641	0.87	0.2016	0.74	0.0039	1	0.798895	1.01	0.967778	0.98	0.808217	1.04	0.850685	-	-	-	-
Fatty Acid, Monohydroxy	2-hydroxynervonate*	0.86	0.021	0.96	0.5669	0.95	0.2035	1.02	0.7739	-	-	-	-	-	-	-	-	0.51	0.687952	1.28	0.257205
	3-hydroxyoctanoate	0.78	0.0858	0.8	0.0438	0.95	0.7292	0.75	0.0198	-	-	-	-	-	-	-	-	0.88	0.777054	1.92	0.185244
	3-hydroxydecanoate	0.77	0.0954	0.82	0.1152	0.89	0.8964	0.68	0.018	-	-	-	-	-	-	-	-	-	-	-	-
	3-hydroxylaurate	0.7	0.0318	0.81	0.0862	0.89	0.9304	0.65	0.0292	-	-	-	-	-	-	-	-	0.91	0.886188	0.74	0.0836613
	3-hydroxymyristate	0.79	0.05	0.92	0.3491	0.93	0.9898	0.73	0.0256	-	-	-	-	-	-	-	-	0.68	0.249389	0.82	0.311666
	3-hydroxyoleate*	0.76	0.0078	0.86	0.2072	0.73	0.0086	0.69	0.001	-	-	-	-	-	-	-	-	2.68	0.0425032	1.77	0.19273
	9-hydroxystearate	0.81	0.0768	0.85	0.5106	0.79	0.1361	0.73	0.0237	-	-	-	-	-	-	-	-	-	-	-	-
Fatty Acid, Dihydroxy	2R,3R-dihydroxybutyrate	0.96	0.8041	0.97	0.8504	0.91	0.4075	1.05	0.4712	0.95	0.507784	0.89	0.246762	1.09	0.323985	1.25	0.0125849	0.75	0.343625	0.47	0.192354
	12,13-DiHOME	1.05	0.9647	0.94	0.7639	1.32	0.0215	1.13	0.227	-	-	-	-	-	-	-	-	0.78	0.97943	1.03	0.802211
	9,10-DiHOME	0.86	0.2773	0.82	0.2496	1.72	2.3614e-05	1.7	0.0002	-	-	-	-	-	-	-	-	0.8	0.539399	1.01	0.891476
Eicosanoid	12-HETE	0.92	0.5869	0.74	0.2272	0.38	0.039	0.28	0.0066	-	-	-	-	-	-	-	-	-	-	-	-
Endocannabinoid	oleoyl ethanolamide	0.82	0.0581	0.9	0.3513	0.73	0.0169	0.69	0.0083	-	-	-	-	-	-	-	-	0.55	0.422494	0.44	0.1305
	palmitoyl ethanolamide	0.88	0.0472	0.92	0.3329	0.81	0.0048	0.82	0.0083	-	-	-	-	-	-	-	-	0.53	0.0493269	0.51	0.0643187
	stearoyl ethanolamide	0.94	0.3096	0.96	0.5127	0.94	0.2597	0.84	0.0096	-	-	-	-	-	-	-	-	0.26	0.0327191	0.89	0.142266
	linoleoyl ethanolamide	0.68	0.0037	0.73	0.011	0.63	0.0051	0.6	0.0028	-	-	-	-	-	-	-	-	0.55	0.485394	0.35	0.574614
Inositol Metabolism	myo-inositol	1.14	0.4642	1.18	0.1837	1	0.9132	0.94	0.6209	1.38	0.355352	2.42	0.00653406	1.05	0.58234	1.46	0.129015	1.53	0.17267	0.97	0.825316
	chiro-inositol	1.77	0.7664	1.03	0.6248	0.82	0.6592	1.23	0.5918	1.14	0.15521	1.59	0.964798	0.27	0.0278309	1.31	0.818199	1.46	0.713497	1.59	0.623063
	scyllo-inositol	-	-	-	-	-	-	-	-	1.19	0.212921	1.16	0.183661	0.99	0.672018	1.25	0.1421	-	-	-	-
Phospholipid Metabolism	choline	0.99	0.8854	0.99	0.888	0.94	0.1709	0.91	0.0135	1.13	0.115971	1.11	0.195638	1.26	0.00135558	1.09	0.106774	1.84	0.0448835	0.79	0.687933
	choline phosphate	0.89	0.5227	1.02	0.8766	0.83	0.7399	0.82	0.8536	0.86	0.27788	1.07	0.520919	1.24	0.294367	1.46	0.364127	12.67	0.0307732	1.97	0.486751
	glycerophosphoinositol*	-	-	-	-	-	-	-	-	2.16	0.00583579	1.39	0.46718	1.69	0.24145	2.07	0.0276478	2.03	0.143291	1.1	0.845326
	trimethylamine N-oxide	0.81	0.8735	0.6	0.0894	0.73	0.1667	0.71	0.1349	1.05	0.956301	0.77	0.338216	0.82	0.103124	0.87	0.140966	0.65	0.528202	0.37	0.0475593
Phosphatidylcholine (PC)	1-palmitoyl-2-oleoyl-GPC (16:0/18:1)	1.05	0.1592	1.04	0.1873	0.98	0.5887	0.96	0.2435	1.22	0.700311	2.96	0.00979698	2.3	0.16117	2.06	0.189285	1.17	0.535876	0.62	0.315361
	1-palmitoyl-2-linoleoyl-GPC (16:0/18:2)	0.97	0.2482	1	0.8922	1.03	0.2751	0.99	0.8926	1.05	0.780729	3.87	0.0142841	1.9	0.0377262	1.32	0.388175	1.06	0.467793	0.96	0.680806
	1-palmitoyl-2-alpha-linolenoyl-GPC (16:0/18:3n3)*	-	-	-	-	-	-	-	-	-	-	-	-	-	-	-	-	4.94	0.0339099	2.25	0.120669
	1,2-dilinoleoyl-GPC (18:2/18:2)	0.85	0.0209	0.94	0.2886	0.94	0.4436	0.89	0.1215	-	-	-	-	-	-	-	-	1.63	0.218171	0.89	0.764095
Phosphatidylglycerol (PG)	1-stearoyl-2-oleoyl-GPG (18:0/18:1)	0.92	0.305	0.91	0.3296	0.73	0.0102	0.82	0.0934	-	-	-	-	-	-	-	-	-	-	-	-
Phosphatidylinositol (PI)	1-stearoyl-2-oleoyl-GPI (18:0/18:1)*	0.96	0.9169	1.08	0.4003	0.79	0.0141	0.79	0.0319	-	-	-	-	-	-	-	-	-	-	-	-
	1-stearoyl-2-arachidonoyl-GPI (18:0/20:4)	1.06	0.3188	1.02	0.8209	0.95	0.1879	0.86	0.004	-	-	-	-	-	-	-	-	-	-	-	-
Lysophospholipid	1-palmitoleoyl-GPC (16:1)*	1.16	0.0815	1.17	0.0487	0.9	0.1552	0.94	0.214	-	-	-	-	-	-	-	-	-	-	-	-
	1-linoleoyl-GPC (18:2)	0.89	0.2293	0.98	0.6337	0.94	0.4294	0.94	0.2815	-	-	-	-	-	-	-	-	2.79	0.021978	1.28	0.457977
	1-linolenoyl-GPC (18:3)*	0.93	0.5599	1.1	0.4878	0.93	0.5718	0.98	0.7402	-	-	-	-	-	-	-	-	3.82	0.0152824	1.49	0.482403
	1-lignoceroyl-GPC (24:0)	0.86	0.1495	0.76	0.0276	0.87	0.2402	0.82	0.0502	-	-	-	-	-	-	-	-	-	-	-	-
	1-palmitoyl-GPI (16:0)	0.97	0.8319	1.06	0.7717	1.23	0.3557	1.14	0.5046	-	-	-	-	-	-	-	-	2.42	0.046159	1.4	0.980725
	1-oleoyl-GPI (18:1)	1.17	0.8395	1.14	0.8704	1.01	0.9193	0.94	0.7511	-	-	-	-	-	-	-	-	6.66	0.014386	1.71	0.917932
	1-linoleoyl-GPI (18:2)*	0.93	0.2736	0.87	0.1154	1.06	0.7127	1.01	0.9906	-	-	-	-	-	-	-	-	7.22	0.00581384	1.24	0.434265
	2-stearoyl-GPE (18:0)*	0.92	0.6839	0.76	0.2278	0.64	0.0391	0.59	0.0367	-	-	-	-	-	-	-	-	-	-	-	-
	1-palmitoyl-GPG (16:0)*	1.1	0.34	1.21	0.0325	0.98	0.7941	0.99	0.9339	-	-	-	-	-	-	-	-	1.25	0.260008	1.63	0.128818
Lysoplasmalogen	1-(1-enyl-oleoyl)-GPE (P-18:1)*	0.82	0.3379	0.98	0.8136	0.65	0.177	0.68	0.3107	-	-	-	-	-	-	-	-	0.44	0.0129542	1.13	0.834738
Plasmalogen	1-(1-enyl-palmitoyl)-2-linoleoyl-GPC (P-16:0/18:2)*	0.9	0.0267	0.93	0.0937	0.98	0.6274	0.96	0.3561	-	-	-	-	-	-	-	-	-	-	-	-
	glycerol	0.89	0.1785	0.92	0.5719	1.12	0.874	0.81	0.0474	0.72	0.297022	0.73	0.215917	1.14	0.800408	0.61	0.203591	1.37	0.520664	1.36	0.265693
Monoacylglycerol	1-palmitoylglycerol (16:0)	1.11	0.3861	1.78	0.2791	1.43	0.3729	2.19	0.0267	-	-	-	-	-	-	-	-	1.31	0.0611252	1.81	0.0799992
	1-palmitoleoylglycerol (16:1)*	0.98	0.9809	0.87	0.7086	0.88	0.8248	0.84	0.5544	-	-	-	-	-	-	-	-	1.35	0.32928	4.79	0.0349434
	1-oleoylglycerol (18:1)	0.93	0.7762	0.93	0.4705	0.96	0.8903	0.95	0.6803	-	-	-	-	-	-	-	-	1.89	0.0493533	2.08	0.477305
	1-linoleoylglycerol (18:2)	0.91	0.6293	0.76	0.1178	0.95	0.865	1	0.9706	-	-	-	-	-	-	-	-	1.42	0.369018	3.15	0.0475176
	1-linolenoylglycerol (18:3)	1.08	0.83	1.29	0.4168	0.94	0.9797	1.06	0.8334	-	-	-	-	-	-	-	-	6.47	0.0497493	45.59	0.0250473
	1-heptadecenoylglycerol (17:1)*	-	-	-	-	-	-	-	-	-	-	-	-	-	-	-	-	1.35	0.0427475	2.45	0.0109015
	2-palmitoylglycerol (16:0)	1.01	0.7632	1.96	0.0795	1.36	0.5458	2.56	0.0133	-	-	-	-	-	-	-	-	0.96	0.356665	1.62	0.0960848
Diacylglycerol	palmitoyl-oleoyl-glycerol (16:0/18:1) [2]*	1.27	0.0418	1.22	0.3358	0.83	0.4919	0.86	0.2604	-	-	-	-	-	-	-	-	1.33	0.118953	0.97	0.440421
	diacylglycerol (16:1/18:2 [2], 16:0/18:3 [1])*	1.17	0.0702	1.08	0.1944	1.07	0.3808	0.93	0.851	-	-	-	-	-	-	-	-	7.95	0.00835594	2.86	0.342124
	palmitoyl-oleoyl-glycerol (16:0/18:1) [1]*	1.28	0.0648	0.93	0.8773	0.86	0.7147	0.9	0.5329	-	-	-	-	-	-	-	-	2.67	0.00784206	1.19	0.702389
	palmitoyl-linoleoyl-glycerol (16:0/18:2) [1]*	1.69	0.0634	1.45	0.2007	1.02	0.9237	1.26	0.4468	-	-	-	-	-	-	-	-	1.96	0.0462656	1.39	0.994109
	palmitoyl-linolenoyl-glycerol (16:0/18:3) [2]*	-	-	-	-	-	-	-	-	-	-	-	-	-	-	-	-	7.64	0.0661609	4.03	0.126662
	palmitoleoyl-linoleoyl-glycerol (16:1/18:2) [1]*	1.2	0.1431	0.77	0.5818	0.89	0.5673	1.02	0.7738	-	-	-	-	-	-	-	-	3.19	0.0215946	1.74	0.862967
	oleoyl-oleoyl-glycerol (18:1/18:1) [1]*	1.23	0.0964	0.94	0.5528	0.89	0.3992	0.84	0.186									1.93	0.031283	1.22	0.603226
	oleoyl-linoleoyl-glycerol (18:1/18:2) [1]	-	-	-	-	-	-	-	-	-	-	-	-	-	-	-	-	1.98	0.0413411	1.6	0.970623
	linoleoyl-linolenoyl-glycerol (18:2/18:3) [1]*	1.44	0.3394	1.03	0.9445	1.35	0.2528	1	0.919	-	-	-	-	-	-	-	-	6.14	0.0470252	15.16	0.0635175
	linolenoyl-linolenoyl-glycerol (18:3/18:3) [1]*	-	-	-	-	-	-	-	-	-	-	-	-	-	-	-	-	39.24	0.0324125	25.29	0.0347789
	linolenoyl-linolenoyl-glycerol (18:3/18:3) [2]*	-	-	-	-	-	-	-	-	-	-	-	-	-	-	-	-	15.89	0.0972955	18.36	0.036652
	oleoyl-linolenoyl-glycerol (18:1/18:3) [2]*	1.29	0.9292	0.75	0.2165	0.33	0.0384	0.64	0.2256	-	-	-	-	-	-	-	-	4.57	0.371117	3.91	0.300615
Galactosyl Glycerolipids	1-palmitoyl-2-linoleoyl-digalactosylglycerol (16:0/18:2)*	-	-	-	-	-	-	-	-	-	-	-	-	-	-	-	-	2.37	0.0678024	0.58	0.0325655
	1-palmitoyl-2-linoleoyl-galactosylglycerol (16:0/18:2)*	-	-	-	-	-	-	-	-	-	-	-	-	-	-	-	-	1.28	0.320345	0.56	0.0484883
	1-palmitoyl-2-linolenoyl-digalactosylglycerol (16:0/18:3)	-	-	-	-	-	-	-	-	-	-	-	-	-	-	-	-	1.73	0.022881	0.92	0.857798
	1,2-dilinoleoyl-digalactosylglycerol (18:2/18:2)*	-	-	-	-	-	-	-	-	-	-	-	-	-	-	-	-	3.58	0.0374437	0.99	0.719092
	1,2-dilinoleoyl-galactosylglycerol (18:2/18:2)*	-	-	-	-	-	-	-	-	-	-	-	-	-	-	-	-	5.73	0.0153338	0.82	0.498408
	1-linoleoyl-2-linolenoyl-galactosylglycerol (18:2/18:3)*	-	-	-	-	-	-	-	-	-	-	-	-	-	-	-	-	2.9	0.00154782	0.95	0.753198
	1-linoleoyl-2-linolenoyl-digalactosylglycerol (18:2/18:3)*	-	-	-	-	-	-	-	-	-	-	-	-	-	-	-	-	2.44	0.006938	1	0.538205
Sphingolipid Synthesis	sphinganine	0.92	0.4902	0.82	0.1368	0.66	0.049	0.69	0.0688	1.71	0.412098	1.91	0.275603	1.94	0.387827	1.53	0.610996	1.14	0.823245	0.3	0.0127538
	sphingadienine	0.69	0.0222	0.74	0.0532	0.55	0.0048	0.56	0.0119	-	-	-	-	-	-	-	-	2.73	0.0321723	0.52	0.119106
	hexadecasphinganine (d16:0)*	-	-	-	-	-	-	-	-	-	-	-	-	-	-	-	-	1.35	0.231231	0.41	0.00967435
Dihydroceramides	N-palmitoyl-sphingosine (d18:1/16:0)	1	0.8424	1.01	0.6923	0.98	0.5367	0.91	0.0462	1.63	0.188884	2.35	0.10099	1.55	0.222584	1.12	0.829007	0.6	0.581477	0.45	0.0216752
Ceramides	palmitoyl dihydrosphingomyelin (d18:0/16:0)*	-	-	-	-	-	-	-	-	1.08	0.570457	1.28	0.094406	1.4	0.0259273	1.16	0.410723	0.48	0.249343	0.66	0.0881185
	N-palmitoyl-sphingadienine (d18:2/16:0)*	1.09	0.7397	1.3	0.2028	1.3	0.2163	0.94	0.7755	-	-	-	-	-	-	-	-	0.34	0.260014	0.58	0.0434602
	N-behenoyl-sphingadienine (d18:2/22:0)*	0.97	0.9033	0.69	0.2143	0.49	0.0301	0.69	0.2451	1.63	0.188884	2.35	0.10099	1.55	0.222584	1.12	0.829007	0.25	0.553844	0.73	0.716818
Hexosylceramides (HCER)	glycosyl-N-palmitoyl-sphingosine (d18:1/16:0)	1	0.6199	0.99	0.8401	1.08	0.0369	1.02	0.4685	-	-	-	-	-	-	-	-	0.34	0.438578	0.62	0.206206
	glycosyl-N-(2-hydroxynervonoyl)-sphingosine (d18:1/24:1(2OH))*	0.8	0.0028	0.98	0.9999	1.08	0.145	1.01	0.6381	-	-	-	-	-	-	-	-	0.34	0.135203	0.64	0.123097
	glycosyl-N-behenoyl-sphingadienine (d18:2/22:0)*	0.91	0.1165	1.01	0.8002	0.98	0.3555	0.87	0.0041	-	-	-	-	-	-	-	-	-	-	-	-
Lactosylceramides (LCER)	lactosyl-N-palmitoyl-sphingosine (d18:1/16:0)	1.03	0.5666	1.04	0.4014	1.08	0.023	1	0.877	-	-	-	-	-	-	-	-	0.77	0.10805	0.81	0.184123
Dihydrosphingomyelins	palmitoyl sphingomyelin (d18:1/16:0)	0.98	0.3036	1	0.8054	1.03	0.1295	1	0.9488	1.46	0.34647	2.02	0.0122998	1.74	0.119444	1.46	0.363474	0.35	0.598567	1.17	0.386918
	sphingomyelin (d18:0/18:0, d19:0/17:0)*	0.96	0.5527	1.22	0.0358	1.17	0.0941	1.07	0.4591	-	-	-	-	-	-	-	-	-	-	-	-
Sphingomyelins	sphingosine	0.88	0.4251	0.84	0.2766	0.57	0.0895	0.6	0.1835	1.55	0.762536	1.85	0.388977	2.47	0.0481384	1.66	0.145226	0.67	0.404593	0.69	0.582566
	stearoyl sphingomyelin (d18:1/18:0)	1	0.8351	1.05	0.2192	1.09	0.0166	1.04	0.2883	-	-	-	-	-	-	-	-	-	-	-	-
	sphingomyelin (d18:1/14:0, d16:1/16:0)*	0.99	0.6668	1.03	0.3628	1.07	0.0057	1.01	0.5677	-	-	-	-	-	-	-	-	-	-	-	-
	sphingomyelin (d18:1/20:1, d18:2/20:0)*	0.96	0.1488	0.99	0.714	1.06	0.0315	1.01	0.5774	-	-	-	-	-	-	-	-	-	-	-	-
	sphingomyelin (d18:1/22:2, d18:2/22:1, d16:1/24:2)*	1.01	0.7259	1.07	0.2199	1.09	0.047	1.07	0.2721	-	-	-	-	-	-	-	-	-	-	-	-
	sphingomyelin (d18:2/23:0, d18:1/23:1, d17:1/24:1)*	1	0.8311	1.01	0.6575	1.06	0.0398	1	0.9854	-	-	-	-	-	-	-	-	-	-	-	-
Sphingosines	hexadecasphingosine (d16:1)*	0.99	0.9097	0.96	0.6193	0.66	0.1617	0.73	0.241	-	-	-	-	-	-	-	-	0.96	0.914574	0.35	0.0230069
Mevalonate Metabolism	17alpha-hydroxypregnanolone glucuronide	-	-	-	-	-	-	-	-	1.19	0.305535	0.81	0.50985	1.47	0.00371631	1.08	0.347744	-	-	-	-
Sterol	cholesterol	1.01	0.8645	1.01	0.9382	0.95	0.1931	0.89	0.0037	-	-	-	-	-	-	-	-	0.58	0.214584	0.74	0.136004
	7-dehydrocholesterol	0.91	0.0297	0.92	0.084	1.51	0.0996	1.14	0.7452	-	-	-	-	-	-	-	-	-	-	-	-
	campesterol	0.92	0.2131	0.78	0.0432	0.99	0.8887	0.91	0.6859	-	-	-	-	-	-	-	-	0.78	0.382839	1.09	0.747298
Pregnenolone Steroids	21-hydroxypregnenolone disulfate	0.84	0.1582	0.82	0.0336	1.03	0.4592	0.98	0.5059	1.1	0.461168	0.79	0.473544	1.47	0.0198377	1.34	0.114078	2.07	0.337763	0.61	0.186334
	pregnenediol sulfate (C21H34O5S)*	1	0.7312	0.96	0.6899	0.99	0.2217	0.91	0.0343	1.2	0.245034	1.2	0.146161	0.9	0.969378	0.88	0.643564	1.07	0.713844	0.78	0.0717243
	pregnenetriol disulfate*	0.94	0.6005	0.92	0.0674	1.1	0.0705	0.98	0.6999	1.12	0.741528	1.07	0.399491	1.47	0.0195931	1.24	0.22088	1.23	0.907897	1	0.101721
Progestin Steroids	5alpha-pregnan-3beta,20beta-diol monosulfate (1)	2.13	0.289	0.96	0.7352	1.02	0.7173	0.33	0.094	1.02	0.894497	1	1	0.87	0.892789	0.28	0.0972895	0.91	0.82762	0.6	0.0368498
	5alpha-pregnan-3beta,20alpha-diol monosulfate (2)	3.25	0.6001	1.22	0.7515	1.08	0.2985	0.45	0.4324	0.43	0.0034402	0.43	0.0034402	0.75	0.836857	0.31	0.306549	1.55	0.724869	0.91	0.714027
	5alpha-pregnan-3beta,20alpha-diol disulfate	2.19	0.3251	0.97	0.8539	1.09	0.4723	0.35	0.1585	2.47	0.120868	1.06	0.38172	1.48	0.183749	0.5	0.581642	1.18	0.326029	0.64	0.0181812
	11-dehydrocorticosterone sulfate	-	-	-	-	-	-	-	-	2.27	0.0447831	1.14	0.652072	1.07	0.830389	1.22	0.611346	-	-	-	-
Corticosteroids	cortisol	1.14	0.2717	1.02	0.864	1.03	0.8183	0.97	0.8589	2.39	0.0803363	1.43	0.361007	1.59	0.218681	1.75	0.0219832	-	-	-	-
	cortisol 21-sulfate	-	-	-	-	-	-	-	-	1.6	0.206376	0.96	0.66804	1.65	0.00886875	1.53	0.0384389	-	-	-	-
	cortisol 21-glucuronide	-	-	-	-	-	-	-	-	1.83	0.165305	1.09	0.677697	1.94	0.0109005	1.85	0.0186847	-	-	-	-
	cortisone	1	0.7228	0.92	0.0857	1.04	0.5294	1.03	0.6171	1.91	0.0446182	1.19	0.507122	1.33	0.0520709	1.69	0.0273	-	-	-	-
	cortisone 21-sulfate	-	-	-	-	-	-	-	-	1.86	0.0414718	0.96	0.848649	1.43	0.36818	1.64	0.267335	-	-	-	-
	tetrahydrocortisone	-	-	-	-	-	-	-	-	1.15	0.724998	0.83	0.721426	1.9	0.0369242	1.49	0.512707	-	-	-	-
	cortolone glucuronide (1)	0.97	0.4934	0.95	0.5772	1.16	0.0261	0.99	0.7599	1.18	0.14885	0.92	0.870375	1.7	0.00131599	1.29	0.0443045	-	-	-	-
	cortolone glucuronide (2)	-	-	-	-	-	-	-	-	1.14	0.236717	0.88	0.726839	1.74	0.00351431	1.33	0.0463886	-	-	-	-
	tetrahydrocortisol sulfate (1)	-	-	-	-	-	-	-	-	1.42	0.198388	0.56	0.382735	2.54	0.00509211	1.71	0.0697589	-	-	-	-
	3alpha,21-dihydroxy-5beta-pregnane-11,20-dione 21-glucuronide	-	-	-	-	-	-	-	-	1.83	0.0515223	1.18	0.750012	1.79	0.00886666	1.35	0.14218	-	-	-	-
	11-ketoetiocholanolone sulfate	-	-	-	-	-	-	-	-	1.4	0.0595114	0.82	0.227637	1.9	0.018994	0.8	0.848153	-	-	-	-
Androgenic Steroids	11-ketoetiocholanolone glucuronide	-	-	-	-	-	-	-	-	1.08	0.261055	0.92	0.427708	1.93	0.00500573	1.44	0.0917199	-	-	-	-
	16a-hydroxy DHEA 3-sulfate	0.94	0.6925	0.76	0.0595	1.03	0.7727	0.87	0.2366	1.24	0.106121	0.82	0.322585	1.08	0.234135	0.97	0.645364	0.65	0.370562	0.53	0.00723954
	dehydroepiandrosterone sulfate (DHEA-S)	1.03	0.3076	1.01	0.8874	1.04	0.1335	1	0.8409	1.1	0.0424723	1.35	0.0637325	1.13	0.413397	1.35	0.130195	1.04	0.603774	0.96	0.87325
	androsterone glucuronide	0.94	0.3818	0.93	0.0643	0.91	0.3338	0.96	0.3193	1.06	0.211399	0.91	0.632991	1.2	0.0332822	1.23	0.107245	-	-	-	-
	epiandrosterone glucuronide	-	-	-	-	-	-	-	-	1.41	0.203444	1	0.982678	1.11	0.0352835	1.26	0.155354	-	-	-	-
	androsterone sulfate	0.91	0.9338	0.86	0.2658	0.97	0.9585	0.98	0.7934	1.21	0.00399774	1.17	0.0481353	1.16	0.397045	1.37	0.0625852	4.47	0.0394445	0.97	0.812181
	etiocholanolone glucuronide	0.97	0.8132	1.1	0.6086	1.16	0.1149	1.03	0.9911	0.99	0.150804	0.9	0.612162	1.31	0.0085857	1.28	0.0488994	-	-	-	-
	5alpha-androstan-3alpha,17alpha-diol monosulfate	1.28	0.0428	1.14	0.1029	0.95	0.7779	0.88	0.282	-	-	-	-	-	-	-	-	0.97	0.504899	1.03	0.938836
	androstenediol (3beta,17beta) monosulfate (1)	1.14	0.1845	1.17	0.0936	1.04	0.2735	1.06	0.9976	1.37	0.0341672	1.58	0.0309645	1.19	0.571914	1.8	0.391514	1.44	0.820969	1.09	0.854822
	11beta-hydroxyandrosterone sulfate (2)	-	-	-	-	-	-	-	-	1	0.527362	0.7	0.725954	1.74	0.0117238	1.32	0.151498	-	-	-	-
	11beta-hydroxyandrosterone glucuronide	0.91	0.3744	0.87	0.3789	1.02	0.6481	0.9	0.412	1.16	0.153906	0.85	0.641523	1.52	0.000981906	1.31	0.0315386	-	-	-	-
	dehydroandrosterone glucuronide	-	-	-	-	-	-	-	-	1.11	0.309939	0.88	0.951401	1.14	0.0334846	1.26	0.10628	-	-	-	-
Secondary Bile Acid Metabolism	isoursodeoxycholate	1.91	0.2984	1.23	0.353	0.56	0.2229	0.37	0.0423	-	-	-	-	-	-	-	-	1.35	0.877592	0.47	0.400727
	glycoursodeoxycholate	1.48	0.9752	1.18	0.5703	0.8	0.4752	0.41	0.2228	1.21	0.748091	1.96	0.224305	1.32	0.785396	0.74	0.41987	0.26	0.0301977	1.12	0.567397
	7,12-diketolithocholate	-	-	-	-	-	-	-	-	-	-	-	-	-	-	-	-	0.66	0.0284792	1	0.120111
